# Supplementary material
Source: PubMed Central journal article supplement (PMC7567509)
Supplement: supp_8.4.E627_2020-0213-1-at.pdf [file supp_8.4.E627_2020-0213-1-at.pdf]

## Appendix 1 (as supplied by the authors): Literature review and data extraction to estimate the population size of persons using shelters in the Greater Toronto Area

Supplemental Table 1: People experiencing homelessness across GTA regions by gender\*:

| Regions                   | Male       | Female     | Others/Don't know/declined |
|---------------------------|------------|------------|----------------------------|
| Halton (1, 2)<br>(n=271)  | 119 (44%)  | 141 (52%)  | 4%                         |
| York (3)<br>(n=389)       | 218 (56%)  | 163 (42%)  | 2%                         |
| Peel (4)<br>(n=922)       | 562 (61%)  | 314 (34%)  | 5%                         |
| Durham (5)<br>(n=291)     | 151 (52%)  | 137 (47%)  | 1%                         |
| Toronto (6)<br>(n= 8,715) | 4706 (54%) | 3660 (42%) | 4%                         |

\*Demographic characteristics were obtained through the Point-in-Time Count survey as shown in the references. The number of participants was a subset of the homeless population in each respective region. The reported numbers here are under the assumption that demographic distribution obtained from the survey is representative of the entire homeless population in each respective region. Please see the reports for details on survey sampling design.

Supplemental Table 2: People experiencing homelessness across GTA regions by age\*:

| Regions              | Frequency (%)     |
|----------------------|-------------------|
| Halton               | —<br>Not reported |
| Peel (n=922) (4)     |                   |
| 16-24 years          | 221 (24%)         |
| 25-54 years          | 553 (60%)         |
| 55+ years            | 148 (16%)         |
| York† (n=389) (3)    |                   |
| 16-24 years          | 101 (26%)         |
| 25-54 years          | 268 (69%)         |
| 55+ years            | 16 (4%)           |
| Durham (n=291) (5)   |                   |
| >16 years            | 49 (17%)          |
| 16-24 years          | 47 (16%)          |
| 25-49 years          | 146 (50%)         |
| 50-64 years          | 44 (15%)          |
| 65+ years            | 5 (2%)            |
| Toronto (n=8715) (6) |                   |
| 16-24 years          | 872 (10%)         |
| 25-34 years          | 1830 (21%)        |
| 35-44 years          | 2527 (29%)        |
| 45-54 years          | 1743 (20%)        |
| 55-59 years          | 697 (8%)          |
| 60+ years            | 872 (10%)         |

\*Demographic characteristics were obtained through the Point-in-Time Count survey as shown in the references. The number of participants was a subset of the homeless population in each respective region. The reported numbers here are under the assumption that demographic distribution obtained from the survey is representative of the entire homeless population in each respective region.

† 1% declined to answer

## References

1. Halton Region. Halton region's point in time count - 2018 dashboard. 2019. <https://www.homelesshub.ca/sites/default/files/attachments/SS-03-19%20Attachment%20%234%20Point%20In%20Time%20Dashboard.pdf>.
2. Community Development Halton. Homelessness in Halton (revised) 2019. <https://www.homelesshub.ca/CommunityProfiles>. (2020 Apr 3, date last accessed)
3. York Region. I count: York Region's 2018 homeless count. 2019. <https://www.homelesshub.ca/sites/default/files/attachments/Working%2BTogether%2Bto%2BPrevent%2BReduce%2BAnd%2BEnd%2BHomelessness%2Bin%2BYork%2BRegion.pdf>.
4. Region of Peel, Peel Alliance to End Homelessness. Everyone counts Peel: 2018 joint point-in-time count and registry week results. 2019. <https://www.homelesshub.ca/sites/default/files/attachments/Final%20Report.pdf>.
5. Community Development Council Durham, Durham Mental Health Services. Durham 2018 pit count report. 2019. [https://www.homelesshub.ca/sites/default/files/attachments/PROOF3\\_2018PIT\\_Report\\_CDCD-1.pdf](https://www.homelesshub.ca/sites/default/files/attachments/PROOF3_2018PIT_Report_CDCD-1.pdf).
6. City of Toronto. Toronto street needs assessment 2018. 2018. <https://www.toronto.ca/wp-content/uploads/2018/11/99be-2018-SNA-Results-Report.pdf>.
7. York Region. Emergency and transitional housing 2020. [https://www.york.ca/wps/portal/yorkhome/support/yr/housing/emergencyandtransitionalhousing/!ut/p/z0/hY7BDolwEES\\_xQNHsw0xwrUhRkAJV-yFVKxQkW1pi8rfi2g86m3e7OzuAIMCGPKbrLmTCvl14gNblwndJnG8I2m-CiNCSU5TPwjJZh9ACux3YLogL33PKLBKoRMPB8Voylmj88ioTDuBddINs9GoTnjEDI](https://www.york.ca/wps/portal/yorkhome/support/yr/housing/emergencyandtransitionalhousing/!ut/p/z0/hY7BDolwEES_xQNHsw0xwrUhRkAJV-yFVKxQkW1pi8rfi2g86m3e7OzuAIMCGPKbrLmTCvl14gNblwndJnG8I2m-CiNCSU5TPwjJZh9ACux3YLogL33PKLBKoRMPB8Voylmj88ioTDuBddINs9GoTnjEDI). (2020 Apr 3, date last accessed)
8. Peel Region. Find a shelter - Region of Peel 2020. <https://www.peelregion.ca/housing/shelters/> (2020 Apr 3, date last accessed)
