# Supplementary material
Source: PubMed Central journal article supplement (PMC7567509)
Supplement: supp_8.4.E627_2020-0213-2-at.pdf [file supp_8.4.E627_2020-0213-2-at.pdf]

## Appendix 2 (as supplied by the authors)

**Supplementary Table 1:** Comparing the estimated case fatality proportion for confirmed cases reported up to May 20, 2020 in the Greater Toronto Area using iPHIS data extracted on May 31 vs. on Aug 6, 2020.

|                                     | May 31, 2020 data cut                               | Aug 6, 2020 data cut                                |
|-------------------------------------|-----------------------------------------------------|-----------------------------------------------------|
| %death (case fatality proportion)   | 1437 (8.7%)                                         | 1672 (10.1%)                                        |
| %resolved                           | 14342 (87%)                                         | 14839 (89.8%)                                       |
| %outcome unknown                    | 711 (4.3%)                                          | 10 (0.1%)                                           |
| Time from case report date to death | Min = -52<br>IQR = 2 – 12<br>Median = 7<br>Max = 50 | Min = -29<br>IQR = 3 - 13<br>Median = 7<br>Max = 89 |

Abbreviation: iPHIS (integrated public health information system); IQR (inter-quartile range)

**Supplementary Table 2: Cumulative and daily number of diagnosed COVID-19 cases in the Greater Toronto Area by outbreak setting as of May 20th, 2020.**

| Setting*                           | Cumulative cases, N(%) | Daily cases on May 20, N(%) |
|------------------------------------|------------------------|-----------------------------|
| LTCH residents                     | 3368 (20.4%)           | 42 (13.5%)                  |
| LTCH staff                         | 1043 (6.3%)            | 14 (4.5%)                   |
| LTCH other                         | 425 (2.6%)             | 5 (1.6%)                    |
| Shelter                            | 372 (2.3%)             | 3 (1.0%)                    |
| Retirement home                    | 620 (3.8%)             | 1 (0.3%)                    |
| Group home                         | 294 (1.8%)             | 0 (0%)                      |
| Correctional facility              | 100 (0.6%)             | 0 (0%)                      |
| Hospital                           | 575 (3.5%)             | 1 (0.3%)                    |
| Other congregate outbreak settings | 389 (2.4%)             | 19 (6.1%)                   |
| Travel related                     | 674 (4.1%)             | 0 (0%)                      |
| Close contact of a confirmed case  | 2945 (17.9%)           | 91 (29.3%)                  |
| No known epidemiological link      | 2889 (17.5%)           | 98 (31.5%)                  |
| Information missing                | 2796 (17.0%)           | 37 (11.9%)                  |

\*Settings are defined as mutually exclusive categories by the order shown in the table (from top to bottom) in the event of multiple exposures. LTCH-other may include volunteers; other congregate outbreak settings include hospitals, correctional facilities, retirement homes, group homes, and other not

yet classified such as workplaces. Information missing category excludes congregate setting cases. Abbreviations: LTCH, long-term care home.

**Supplementary Table 3:** Age and sex-specific comparison in cumulative case fatality proportion and the proportion of individuals tested positive between LTCH residents and the rest of the population in the Greater Toronto Area as of May 20, 2020.

|                            | Male            |                         | Female           |                         |
|----------------------------|-----------------|-------------------------|------------------|-------------------------|
|                            | LTCH            | Rest of the population* | LTCH             | Rest of the population* |
| Case fatality proportion   |                 |                         |                  |                         |
| Age 60-70                  | 17 (17.3%)      | 62 (7.1%)               | 18 (21.2%)       | 25 (2.8%)               |
| Age 70-80                  | 71 (27.5%)      | 88 (21.3%)              | 57 (18.2%)       | 34 (10.0%)              |
| Age 80+                    | 264 (37.4%)     | 111 (30.5%)             | 457 (26.4%)      | 133 (22.8%)             |
| Case fatality rate ratio   |                 |                         |                  |                         |
| Age 60-70                  | 2.4 (1.5 – 4.0) | ref                     | 7.6 (4.3 – 13.3) | ref                     |
| Age 70-80                  | 1.3 (1.0 – 1.7) | ref                     | 1.8 (1.2 – 2.7)  | ref                     |
| Age 80+                    | 1.2 (1.0 – 1.5) | ref                     | 1.2 (1.0 – 1.4)  | ref                     |
| Proportion tested positive |                 |                         |                  |                         |
| Age 60-70                  | 156 (19.2%)     | 801 (10.4%)             | 134 (17.1%)      | 815 (7.5%)              |
| Age 70-80                  | 262 (17.4%)     | 382 (7.5%)              | 304 (14.5%)      | 319 (6.2%)              |
| Age 80+                    | 673 (16.2%)     | 331 (5.6%)              | 1621 (14.0%)     | 513 (5.5%)              |
| Test positivity rate ratio |                 |                         |                  |                         |
| Age 60-70                  | 1.9 (1.6 – 2.2) | ref                     | 2.3 (1.9 – 2.7)  | ref                     |
| Age 70-80                  | 2.3 (2.0 – 2.7) | ref                     | 2.4 (2.0 – 2.7)  | ref                     |
| Age 80+                    | 2.9 (2.5 – 3.3) | ref                     | 2.6 (2.3 – 2.8)  | ref                     |

\*Excludes the identifiable persons using shelters. Abbreviation: LTCH, long-term care home.
