# Supplementary material
Source: PubMed Central journal article supplement (PMC7567509)
Supplement: supp_8.4.E627_2020-0213-3-at.pdf [file supp_8.4.E627_2020-0213-3-at.pdf]

**Appendix 3 (as supplied by the authors)**

### Appendix 3

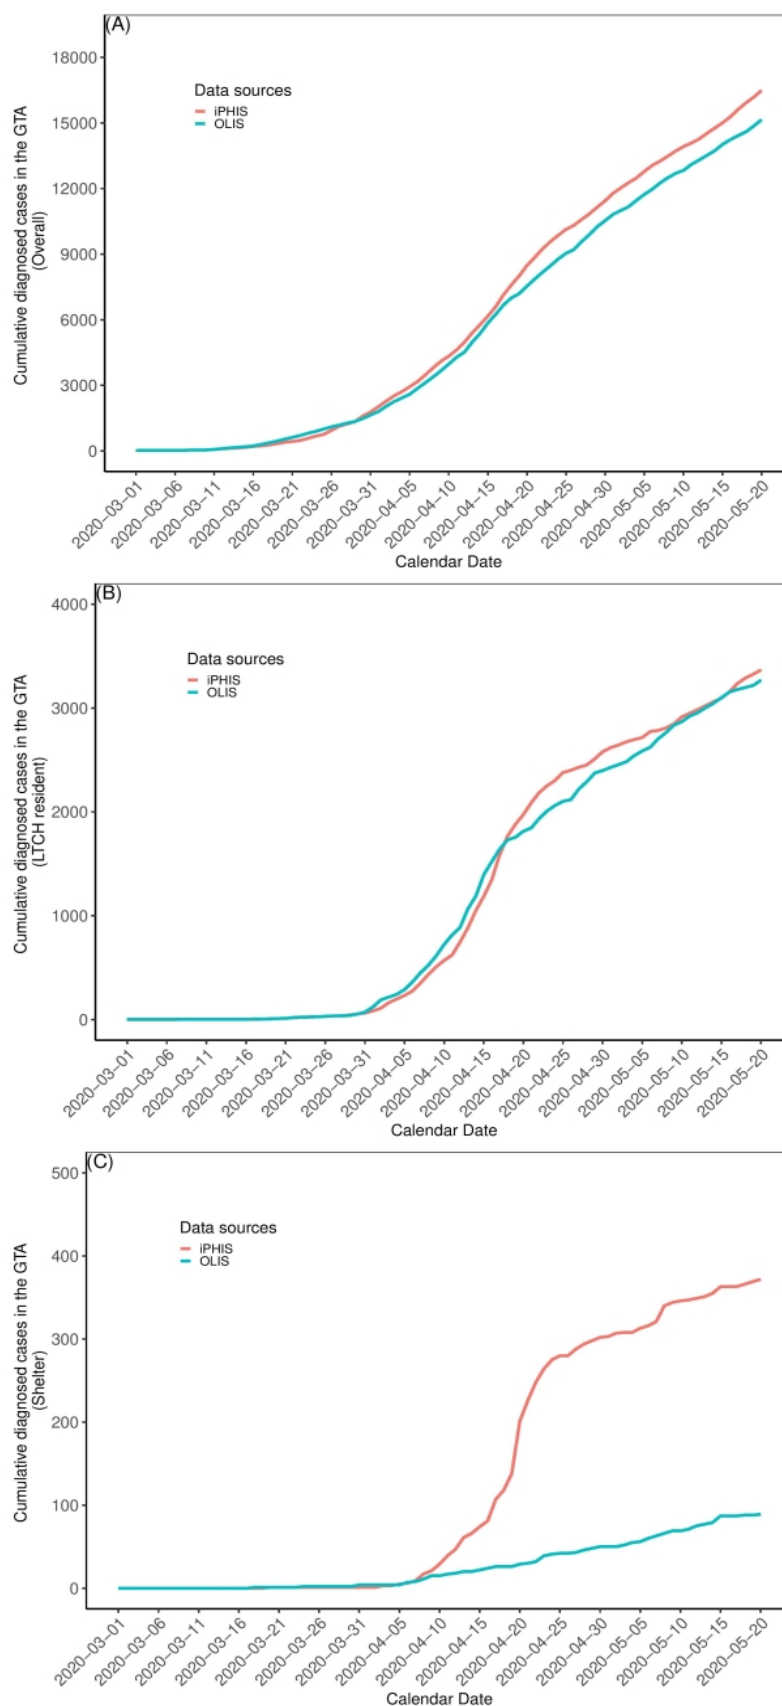

**Appendix 3 Supplemental Figure 1:** Cross-check between iPHIS and OLIS data for the following measures in the Greater Toronto Area: (A) Cumulative diagnosed cases overall; (B) Cumulative diagnosed cases for LTCH-residents; and (C) Cumulative diagnosed cases for persons using shelters. Data sources: iPHIS, the integrated Public Health Information System; OLIS, the Ontario Laboratories Information System. The calendar date refers to the date the case was reported to the public health unit. Abbreviation: LTCH, long-term care homes.

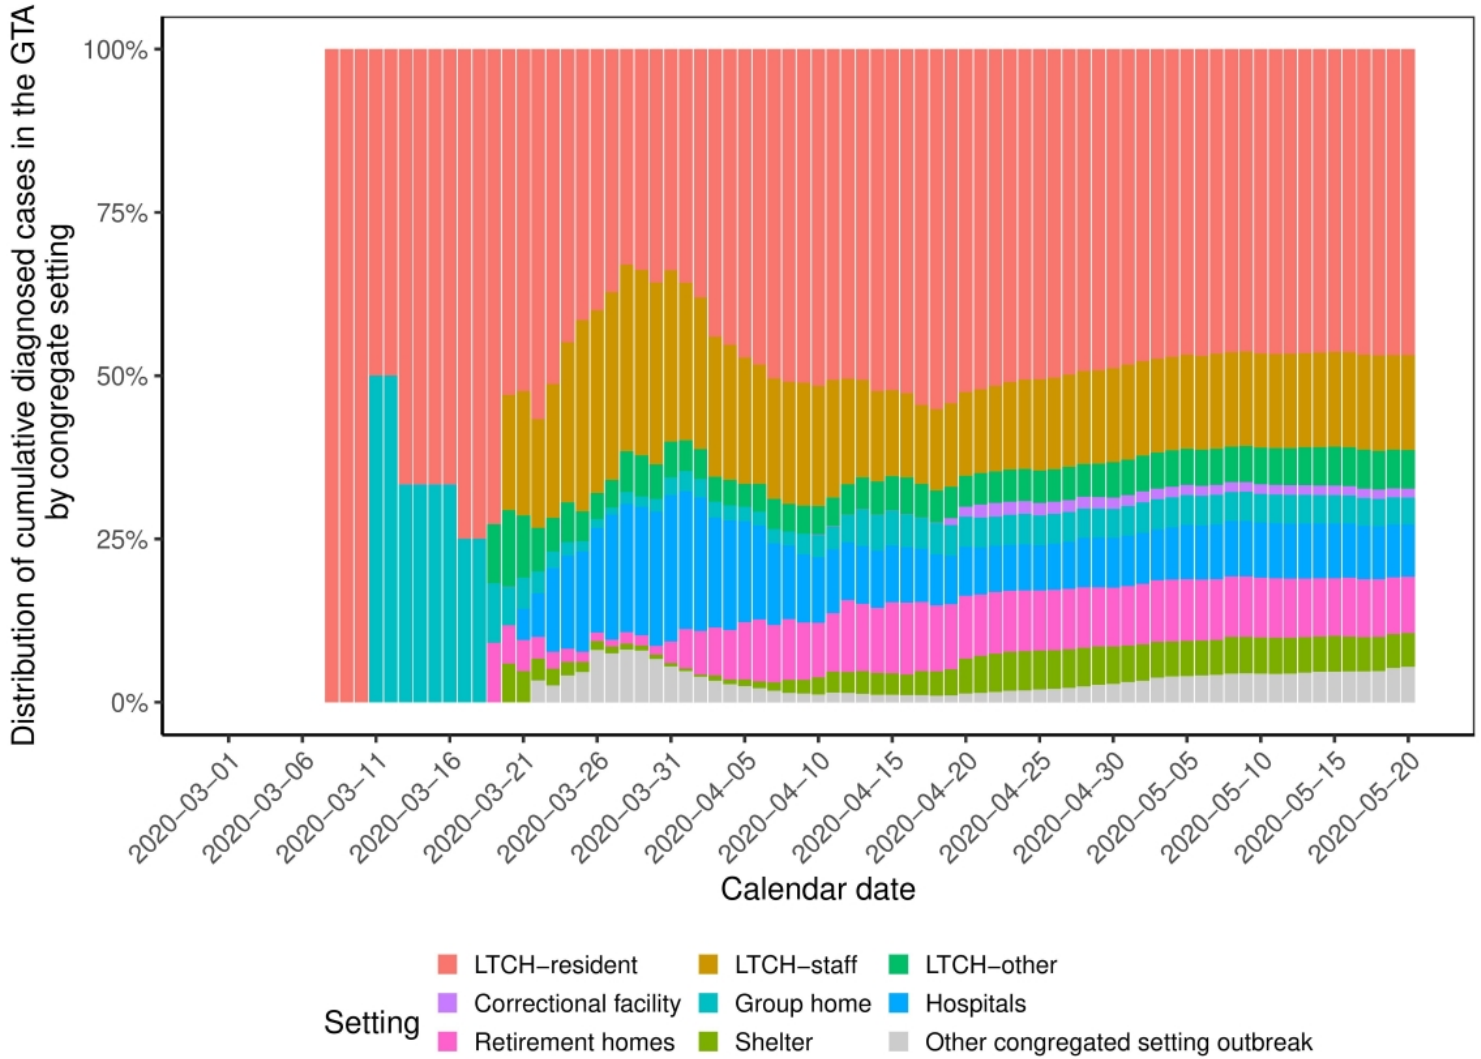

**Appendix 3 Supplemental Figure 2:** Distribution of cumulative diagnosed COVID-19 cases in the Greater Toronto Area (GTA) by setting over time in congregated settings. LTCH-other may include volunteers; other congregated settings refer to those that have not yet been classified in the data source, and may include other workplace settings where an outbreak has been declared. Data sources: iPHIS: integrated Public Health Information System. Abbreviations: GTA, Greater Toronto Area; LTCH, long-term care homes.

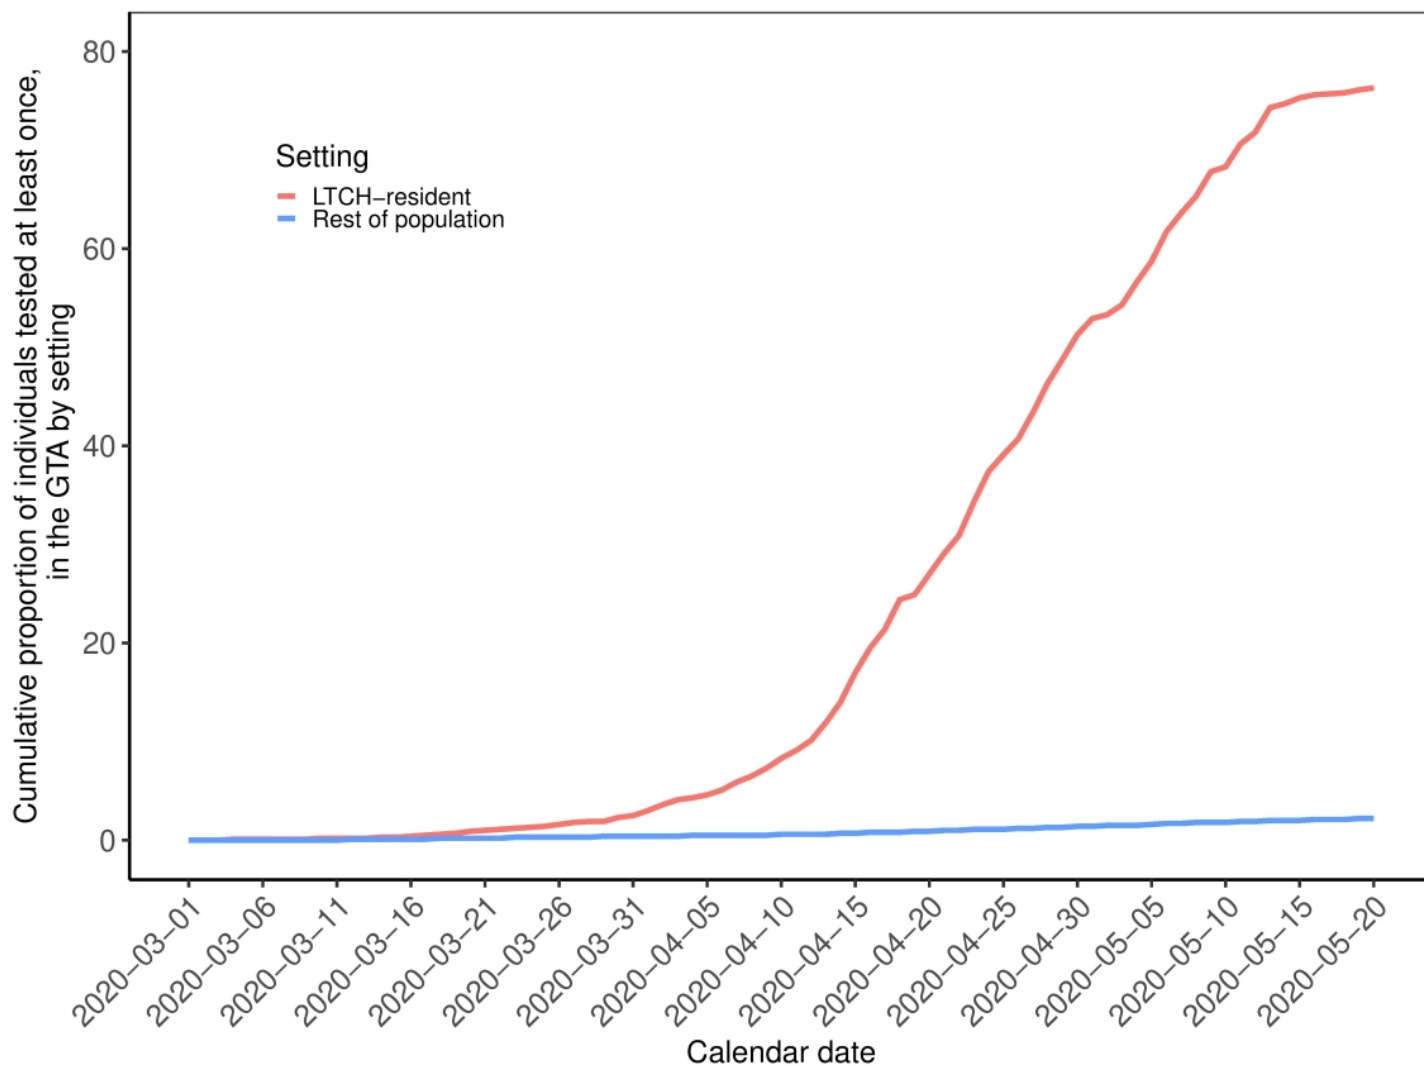

**Appendix 3 Supplemental Figure 3:** Cumulative proportion of population who had at least one COVID-19 test in the Greater Toronto Area by outbreak setting. The calendar date refers to the date when specimen was collected. Data sources: OLIS: Ontario Laboratories Information System. Abbreviations: GTA, Greater Toronto Area; LTCH, long-term care homes.

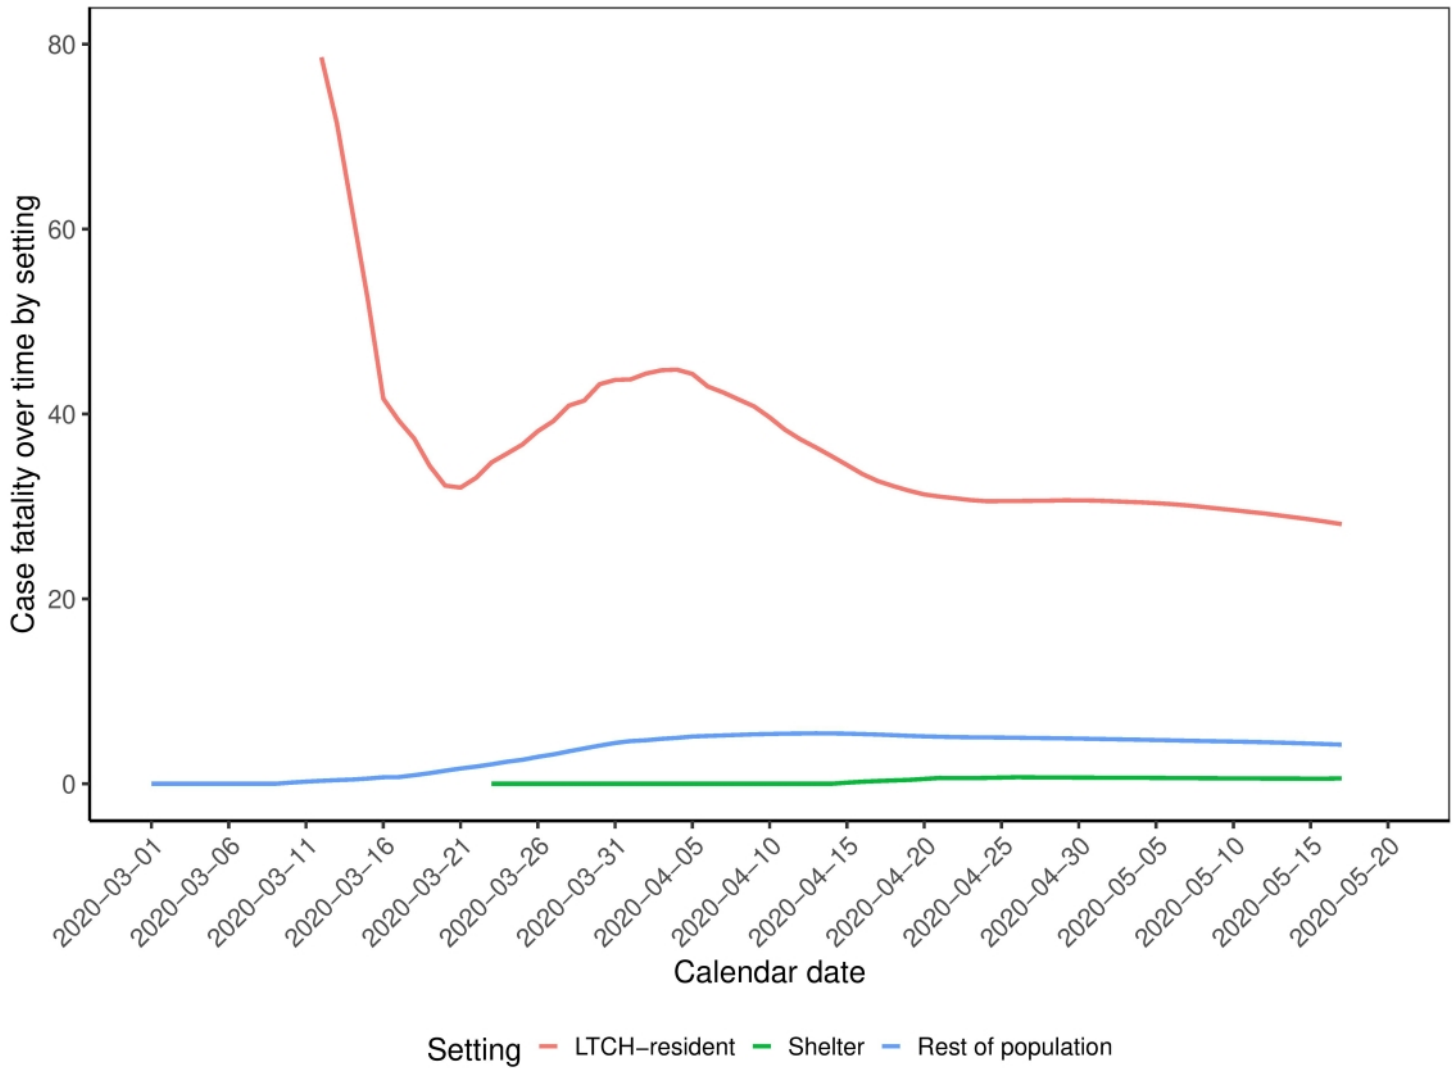

**Appendix 3 Supplemental Figure 4:** Cumulative case fatality proportion over time in the Greater Toronto Area by outbreak setting. The calendar date refers to the date when the case was reported to the public health unit; and the follow-up was till May 31, 2020 to determine the outcome of the cases. A rolling average of 7 days was computed using the center method (e.g., to compute the case fatality proportion of any cases reported up to a certain date, the data 3 days prior and after were used to compute the average). Data sources: iPHIS: integrated Public Health Information System. Abbreviations: LTCH, long-term care homes.
